# Supplementary material for: Exogenous Application of dsRNA for Protection against Tomato Leaf Curl New Delhi Virus
Source: MDPI journal article supplement (doi:10.3390/v16030436), 2024-03-12
Supplement: s1 [file s1]

**Supplementary Table 1.** List of primers used in this work.

| <b>Name</b>           | <b>Sequence (5' to 3')</b> | <b>Reference</b>    |
|-----------------------|----------------------------|---------------------|
| <b>dsND_endPCR_fw</b> | ATGTATGCCTTGACGTCCGA       | This work           |
| <b>dsND_endPCR_rv</b> | GATTCACGCACAGGGGAGTA       | This work           |
| <b>dsND_qPCR_fw</b>   | CGTAAGCCCGTCCAGATTTG       | This work           |
| <b>dsND_qPCR_rv</b>   | TGCCTGACCAATCACGACAT       | This work           |
| <b>qToLCNDV_B_fw</b>  | TCCAAGGATTCTTATCCTTKAGAGAG | Luigi et al., 2020  |
| <b>qToLCNDV_B_rv</b>  | CAAGCAGAATTCACAATTCCAATC   | Luigi et al., 2020  |
| <b>ZuEF-1A_fw</b>     | GCTTGGGTGCTCGACAAACT       | Obrero et al., 2011 |
| <b>ZuEF-1A_rv</b>     | TCCACAGAGCAATGTCAATGG      | Obrero et al., 2011 |
