# Supplementary material for: Exogenous Application of dsRNA for Protection against Tomato Leaf Curl New Delhi Virus
Source: MDPI journal article supplement (doi:10.3390/v16030436), 2024-03-12
Supplement: s1 [file s1]

**Supplementary Table 2.** Reads statistics

|                                       | raw reads  | clean reads | reads mapping on dsRNA-V | % reads mapping on dsRNA-V |
|---------------------------------------|------------|-------------|--------------------------|----------------------------|
| <b>treated leaves</b>                 | 87,457,181 | 72,844,452  | 2,589,756                | 3.56                       |
| <b>newly emerged untreated leaves</b> | 59,665,201 | 46,276,817  | 318                      | 0.00069                    |
